# Supplementary material
Source: Springer Nature journal article supplement (https://www.springerprofessional.de/resource/supplementary/40095_2011_8_MOESM14_ESM.pdf/11899688)
Supplement: MOESM14 [file 11899688]

Continuous

powergui

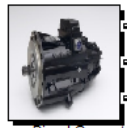

Diesel Generator 925kW

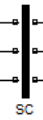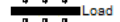

Main Average load 500 kW

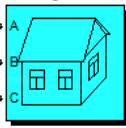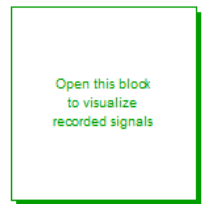

Data Acquisition Station 1

Open this block to visualize recorded signals

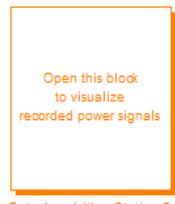

Data Acquisition Station 2

Open this block to visualize recorded power signals

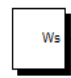

Wind Field

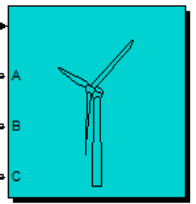

6x65 kW wind turbines

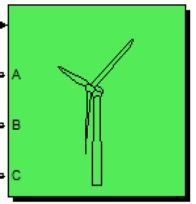

3x100kW wind turbines

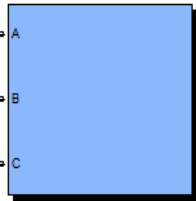

150kW Pumped hydro storage system

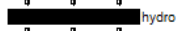

### Wind-Diesel-Pumped hydro hybrid power system for Ramea, Newfoundland
